1 Title page:

2 Lower intake of animal-based products links to improved weight status, independent  
3 of depressive symptoms and personality in the general population

4 Evelyn Medawar<sup>1,2,3</sup>, Cornelia Enzenbach<sup>4</sup>, Susanne Röhr<sup>5</sup>, Arno Villringer<sup>1,2,3,6</sup>, Steffi  
5 G. Riedel-Heller<sup>5</sup>, A. Veronica Witte<sup>1,6</sup>

6 1 Department of Neurology, Max Planck Institute for Human Cognitive and Brain  
7 Sciences, Leipzig, Germany

8 2 Berlin School of Mind and Brain, Humboldt-Universität zu Berlin, Germany

9 3 Charité - Universitätsmedizin Berlin; Humboldt-Universität zu Berlin, Germany

10 4 Institute for Medical Informatics, Statistics and Epidemiology, University Clinic of  
11 Leipzig, Germany

12 5 Institute of Social Medicine, Occupational Health and Public Health, University of  
13 Leipzig, Germany

14 6 CRC 1052 "Obesity Mechanisms", Subproject A1

15

16 Corresponding author: Evelyn Medawar [medawar@cbs.mpg.de](mailto:medawar@cbs.mpg.de)

17 Max Planck Institute for Human Cognitive and Brain Sciences, Stephanstraße 1a,  
18 04103 Leipzig, Germany, +49 341 9940-2427

19

20

21

22

23

24

25

26

27

28

29

30

31

32

33

1 **Abstract (250 words)**

2 **Background:** Restricting animal-based products from diet may exert beneficial  
3 effects on weight status, however whether this is also true for emotional health is  
4 unclear. Moreover, differential personality traits may underlie restrictive eating habits  
5 and therefore potentially confound diet-health associations. To systematically assess  
6 whether restrictive dietary intake of animal-based products relates to lower weight  
7 and higher depressive symptoms, and how this is linked to personality traits in the  
8 general population.

9 **Methods:** Cross-sectional data was taken from the baseline LIFE-Adult study  
10 collected from 2011-2014 in Leipzig, Germany (n = 8943). Main outcomes of interest  
11 were 12-month dietary frequency of animal-derived products measured using a Food  
12 Frequency Questionnaire (FFQ), body mass index (BMI) (kg/m<sup>2</sup>), and the Center of  
13 Epidemiological Studies Depression Scale (CES-D). Personality traits were assessed  
14 in a subsample of n = 7906 using the Five Factor Inventory (NEO-FFI).

15 **Findings:** Higher restriction of animal-based product intake was associated with a  
16 lower BMI (age-, sex- and education-adjusted, n = 8943;  $\beta = -.07$ ,  $p < .001$ ), but not  
17 depression score. Personality, i.e. lower extraversion ( $F_{(1,7897)} = 9.8$ ,  $p = .002$ ), was  
18 related to frequency of animal product intake. Further, not diet but personality was  
19 significantly associated with depression, i.e. higher neuroticism ( $\beta = .024$ ), lower  
20 extraversion ( $\beta = -.006$ ), lower agreeableness ( $\beta = -.001$ ), lower conscientiousness  
21 ( $\beta = -.007$ ) and higher BMI ( $\beta = .004$ ) (all  $p < .001$ , overall model,  $R^2 = .21$ ). The  
22 beneficial association with lower weight seemed to be driven by the frequency of  
23 meat product intake and not secondary animal products. Likewise, the overall  
24 number of excluded food items from the individual diet was associated with a lower  
25 BMI (age-, sex- and education-adjusted, n = 8938,  $\beta = -.15$ ,  $p < .001$ ) and  
26 additionally with lower depression scores ( $\beta = -.004$ ,  $t = -4.1$ ,  $p < .001$ ,  $R^2 = .05$ ,  
27 corrected for age, sex and education), also when additionally correcting for  
28 differences in personality traits ( $\beta = -.003$ ,  $t = -2.7$ ,  $p = .007$ ,  $R^2 = .21$ ).

29 **Interpretation:** Higher restriction of animal-based products in the diet was  
30 significantly associated with a lower BMI, but not with depressive symptoms scores  
31 in a large well-characterized population-based sample of adults. In addition, we  
32 found that certain personality traits related to restricting animal-based products – and  
33 that those traits, but not dietary habits, explained a considerable amount of variance  
34 in depressive symptoms. Upcoming longitudinal studies need to confirm these  
35 findings and to test the hypothesis if restricting animal-based products, esp. primary  
36 animal products ((processed) meat, wurst), conveys benefits on weights status,  
37 hinting to a beneficial relationship of animal-based restricted diets in regard to  
38 prevention and treatment of overweight and obesity.

39 **Funding:** We thank all study participants. We very much appreciate the help of the  
40 physicians who performed the clinical examinations and data collection, in particular  
41 Ulrike Scharrer, Annett Wiedemann, Kerstin Wirkner and her team. This work was  
42 supported by LIFE—Leipzig Research Centre for Civilisation Diseases, University of  
43 Leipzig. LIFE is funded by means of the European Union, by means of the European  
44 Social Fund (ESF), by the European Regional Development Fund (ERDF), and by  
45 means of the Free State of Saxony within the framework of the excellence initiative.  
46 This work was supported by a scholarship (EM) by the German Federal  
47 Environmental Foundation and by the grants of the German Research Foundation  
48 contract grant number CRC 1052 “Obesity mechanisms” Project A1 (AV) and WI  
49 3342/3-1 (AVW). The corresponding author had full access to all the data in the  
50 included in the analysis and had final responsibility for the decision to submit for  
51 publication.

1 Preregistered analysis plan on OSF <https://osf.io/4w69q>.

2 Keywords: body weight; diet; plant-based; meat; depression; personality; population-  
3 based

4

5

6

7

8

9

10

11

12

13

14

15

16

17

18

19

20

21

22

23

24

25

26

27

28

29

30

31

1 **Graphical abstract**

2

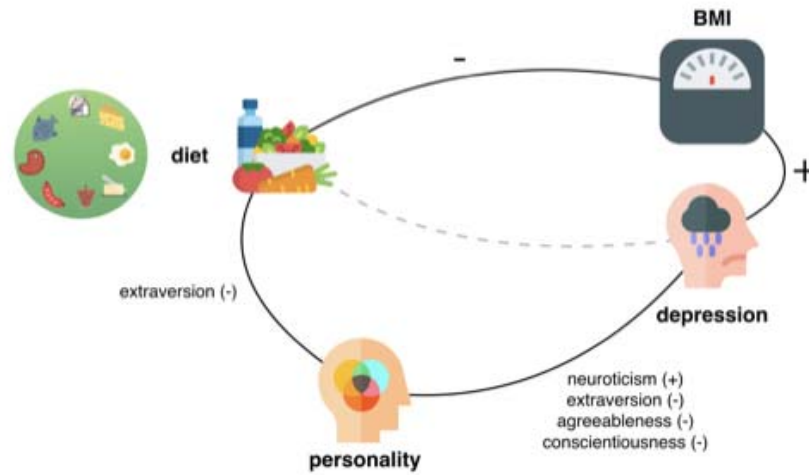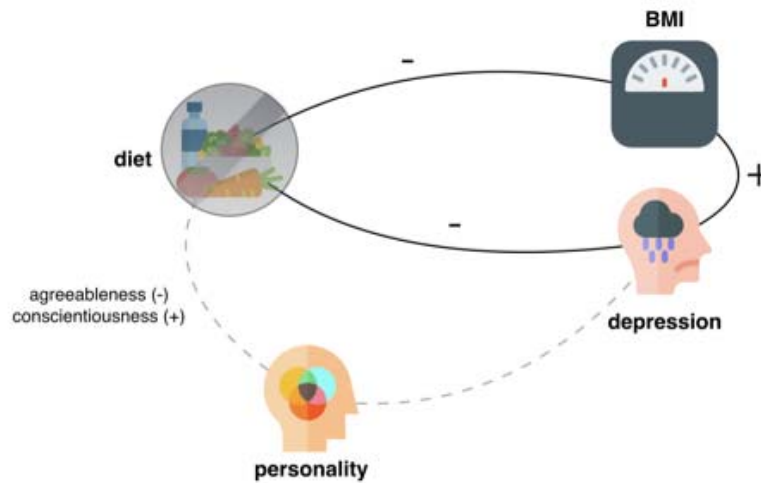

3

4

**black:** main pre-registered analysis **grey:** replication analysis; **+** : significant positive associations - : significant negative associations

5

6

7

1 **Research in context**

2 **Evidence before this study**

3 Restriction of animal-based products in eating patterns such as vegetarian and  
4 vegan diets are widely debated to convey either health benefits or risks. Large  
5 population-based studies as well as randomized controlled trials investigated  
6 medium to long-term effects of plant-based diets on different aspects of health, i.e.  
7 metabolic and mental health, with partly inconsistent findings. Yet, recent evidence  
8 accumulates indicating that benefits of plant-based diets are multi-fold and affect  
9 both human health and planetary health in a positive way.

10 **Added value of this study**

11 To our knowledge, no previous study has combined all three domains of diet,  
12 metabolic health and mental health. Here, we aim to assess these domains in a  
13 comprehensive manner in order to understand the complex interplay of lifestyle  
14 factors (such as diet) on health-related measures. Moreover, we extended the  
15 analysis to further lifestyle-relevant measures, such as personality traits, which we  
16 could show to be a (strong) confounding factor for the association observed between  
17 the restriction of animal-based products and depression. Our analyses for the first  
18 time include a large population-based sample of German individuals investigating  
19 dietary patterns on a continuous scale on their association with weight status,  
20 personality traits and depressive symptoms.

21 **Implications of all the available evidence**

22 Our analysis contributes to the public health relevance of restricting animal-based  
23 products by showing beneficial effects on weight status without impeding personality  
24 traits or depressive symptoms. Our results emphasize the relevance of reducing  
25 frequency of animal-based products for health reasons for the general population,  
26 supporting the adoption of a flexitarian, meat-reduced diet.

27

28

29

30

31

32

33

34

35

36

37

38

39

## 1 Introduction

2 Animal product-restrictive eating patterns such as vegetarian and vegan diets are  
3 debated to convey either health benefits or risks (reviewed in <sup>1</sup>). For example,  
4 epidemiological studies like the Adventist studies (n = 22,000-96,000) found that  
5 plant-based eating habits compared to omnivorous diets are associated with lower  
6 all-cause mortality and less frequent with cardiovascular diseases <sup>2,3</sup>. Other studies  
7 like the EPIC-Oxford study (n~64,000) <sup>4</sup> and the „45 and Up Study“ (n~267,000) <sup>5</sup>  
8 showed however no effect of a plant-based diet on mortality rate. The 18 years  
9 follow-up of the EPIC-Oxford study showed a decrease of ischaemic heart disease  
10 prevalence on the one hand, and an increased odds ratio for total stroke on the other  
11 hand in fish-eaters and vegetarians compared to meat-eaters <sup>6</sup>. Intervention studies  
12 in small to moderate sample sizes (n~100) indicated that medium-term (12-74  
13 weeks) vegan diets, compared to omnivorous diets, leads to weight loss and to a  
14 decrease in type 2 diabetes symptoms, even when caloric intake was comparably  
15 low between the diets <sup>7-9</sup>.

16 While the exact mechanisms mediating these effects are far from fully understood,  
17 improved energy metabolism, reductions of systemic low-grade inflammation as well  
18 as changes in microbiome-gut-brain signaling might play a pivotal role <sup>1,10-14</sup>.

19 Further, individuals showing restrictive eating patterns, i.e. excluding animal-derived  
20 food, may be more or less prone to develop mood disturbances compared to those  
21 with omnivorous eating styles: large epidemiological studies (n = 6,422-90,380)  
22 showed higher depressive symptoms in vegetarians and vegans <sup>15-17</sup> and in those  
23 with orthorexic behaviour <sup>18</sup>. Yet other (smaller) cross-sectional (n = 620) and  
24 interventional (n = 39-291) studies proposed a positive effect of plant-based diets on  
25 well-being and subclinical depression scores <sup>19-22</sup>. Recently, it has been suggested  
26 that not meat-restriction per se, but the number of excluded food groups predicts  
27 higher depressive scores <sup>17</sup>.

28 In addition, both weight gain and weight loss may relate to depressive symptoms <sup>23</sup>,  
29 and obesity and depression are assumed to share not only certain symptoms but  
30 also genetic pathways and personality traits, in particular neuroticism (reviewed in <sup>24</sup>).  
31 For example, studies showed that higher neuroticism and lower conscientiousness  
32 correlate with a higher BMI and more depressive symptoms <sup>25,26</sup>. Moreover,  
33 differences in personality traits and demographic factors such as age, sex and  
34 education have also been linked to more or less restrictive lifestyle habits, including  
35 diet <sup>27-29</sup>.

36 Taken together, these factors likely introduce confounding in studies assessing the  
37 relationship between diet, weight status and depressive symptoms separately.  
38 However, these complex dependencies have not always been taken into account in  
39 previous studies, rendering a definitive conclusion on whether animal product-  
40 restrictive eating habits convey health benefits or health risks difficult. We therefore  
41 aimed to systematically determine the interplay between animal-restrictive vs.  
42 omnivorous dietary habits (measured on a continuum as frequency of animal-based  
43 food intake), weight status, depressive symptoms and personality traits in a large  
44 population-based sample of adults in Germany.

45 We hypothesize that: 1) higher restriction of animal-based products is associated  
46 with lower BMI (kg/m<sup>2</sup>), even when accounting for potential confounding factors, 2)  
47 higher restriction of animal-based products is associated with certain personality  
48 traits, measured using the Five-Factor Inventory (NEO-FFI), 3) higher restriction of  
49 animal-based products is associated with higher depression scores (measured using

1 CES-D), yet the association may attenuate when taking differences in demographics  
2 and personality traits into account.

### 3 **Methods.**

4 All analyses and hypotheses have been preregistered in the Open Science  
5 Framework (OSF) at <https://osf.io/4w69q>. Participants were drawn from the  
6 population-based LIFE-Adult cohort, which aims to explore causes and  
7 developments of common civilization diseases such as obesity, depression and  
8 dementia (see <sup>28</sup> for details). Volunteers underwent anthropometric measurements  
9 and answered extensive questionnaires regarding dietary habits, depressive mood  
10 and personality (see below for details).

11 *Inclusion criteria.* The initial dataset consisted of  $n = 10,083$  participants taken from  
12 the Adult Baseline and Adult Baseline Plus samples. Subjects were included into the  
13 analysis if valid and complete measures of age, sex, education, BMI, CES-D and  
14 FFQ were available, resulting in a sample of  $n = 8,943$  (sample 1) and a subsample  
15 with additional available personality trait measure of  $n = 7,906$  (sample 2, Figure 1).  
16 Note that results from sample 2 may slightly deviate from the previously reported  
17 pilot analyses in the OSF registration due to partially non-overlapping samples and  
18 an extension to a personality questionnaire that was widely available in the dataset.

19

20

21

22

23

24

25

26

27

28

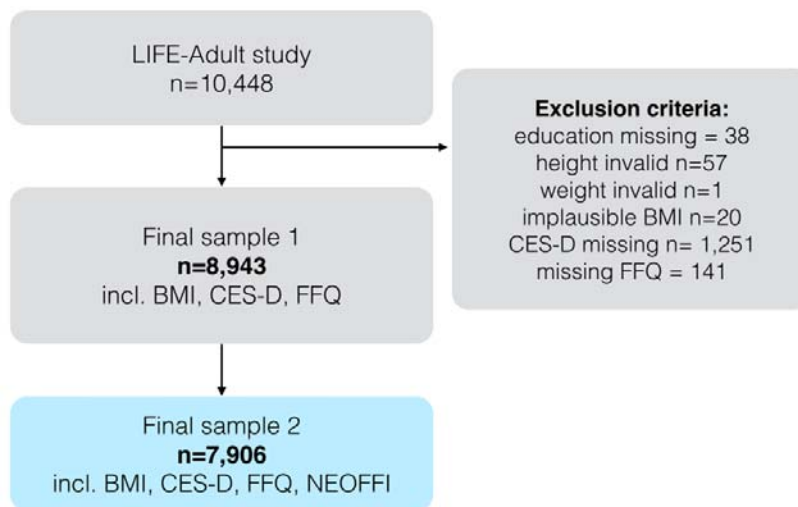

29

Figure 1: Flowchart of sample selection for sample 1 and sample 2.

30

Figure 1: Flowchart of sample selection for sample 1 and sample 2.

31

Abbreviations: BMI=Body-Mass-Index, CES-D=Center of Epidemiological Studies Depression Scale,  
32 FFQ=Food Frequency Questionnaire, NEOFFI=NEO Five-Factor-Inventory.

33

34 *Ethics.* The institutional ethics board of the Medical Faculty of the University of  
35 Leipzig raised no concerns regarding the study protocol and all participants provided  
36 written informed consent.

37 *Demographics.* Education levels were computed according to Comparative Analysis  
38 of Social Mobility in Industrial Nations levels (CASMIN) <sup>30</sup> into three levels (low,  
39 middle, and high).

1 *Anthropometry.* Body weight was measured with scale SECA 701, height was  
2 measured with height rod SECA 220 (SECA GmbH & Co. KG). Body weight (kg) and  
3 body height (m) were used to calculate body-mass-index (BMI) ( $\text{kg}/\text{m}^2$ ). For  
4 additional analyses WHO classification for obesity was used: underweight  
5  $<18.5\text{kg}/\text{m}^2$ , normal-weight  $\geq 18.5$  and  $<25\text{kg}/\text{m}^2$ , overweight  $\geq 25$  and  $<30\text{kg}/\text{m}^2$ ,  
6 obese  $\geq 30\text{kg}/\text{m}^2$ .

7 *Personality.* Personality traits were measured with the German version of the Big  
8 Five via Short Forms (16-Adjective Measure)<sup>31</sup>; subscales computed for  
9 Neuroticism, Extraversion, Openness, Agreeableness and Conscientiousness by  
10 building summed scores according to the test's manual. In a subsample personality  
11 traits were measured with the German version of the NEOFFI-30<sup>32,33</sup>.

12 *Depressive scores.* Depressive scores (self-reported) were assessed by the Centre  
13 of Epidemiologic Studies-Depression (CES-D) scale<sup>34</sup>.

14 *Dietary restriction scores (DRS).* Food group items were taken from a questionnaire  
15 asking for self-reported food intake frequency over the last 12 months. A composite  
16 score for the restriction of animal-derived food items was calculated (Figure 2),  
17 including 9 questions regarding the following food groups: meat, processed meat,  
18 wurst, fish, eggs, dairy (yoghurt and cream cheese), cheese, milk and butter (animal  
19 DRS). Answers ranged from *multiple times daily* (1 per item; 9 for summed score),  
20 *daily/(almost) daily*, *multiple times a week*, *weekly*, *2-3 times monthly*, *1 or less a*  
21 *month* to *(almost) never* (7 per item; 63 for summed score). The higher the score,  
22 the lower the frequency of consumption of animal-based products. Light products  
23 were recoded from 1-5 to 1-7, and either the normal or the light product was chosen  
24 for scoring depending on higher frequency; if both were equally frequent, the normal  
25 item was chosen (applicable for wurst, dairy, cheese, butter and milk). Measures  
26 were ordinal, but for analysis purposes treated as linear, which is a common  
27 procedure for scoring lifestyle questionnaire data<sup>35,36</sup> and has been shown to  
28 perform robustly in parametric analyses (discussed in<sup>37</sup>). Note that the questionnaire  
29 did not include an option such as "I prefer not to answer" or "I don't know". Missing  
30 values were replaced by the population mean in line with recommendation to use  
31 imputation for missing values in nutritional epidemiology<sup>38</sup>. Subjects with >20%  
32 missing answers out of the 33 food items (excl. drink items) were excluded from the  
33 analysis (code and supplementary info available here  
34 ([https://osf.io/m7hxx/?view\\_only=91863f44bae44371a1317072334df9fd](https://osf.io/m7hxx/?view_only=91863f44bae44371a1317072334df9fd))).

35 To further investigate the difference between leaving out primary (meat, bone, and  
36 marrow, representing meat-restrictive diets) and/or secondary (stemming from  
37 animal labor like milk, representing vegetarian diets) animal products from the diet,  
38 we further tested whether potential associations were specific to either food groups  
39 by computing two additional scores a) primary DRS and b) secondary DRS (Suppl.  
40 Table 1).

41 An additional score represents the number of restricted food items (adapted from<sup>17</sup>  
42 by counting all *(almost) never* items of 33 items FFQ (excluding drinks and light  
43 products) (score min. 0 to max. 33) within the last 12 months ( $5.1 \pm 2.9$  items  
44 ( $\text{mean} \pm \text{SD}$ ), range 0-19) (overall DRS).

45 All computed scores were normally distributed (skewness  $< 1.0$ , kurtosis  $\leq 2.0$ )  
46 (Suppl. Figure 1). Moderate positive correlations were observed between meat and  
47 wurst ( $\rho = .46$ ), processed meat and meat ( $\rho = .26$ ), processed meat and wurst ( $\rho =$   
48  $.22$ ), dairy and cheese ( $\rho = .42$ ), and dairy and milk ( $\rho = .28$ ) consumption (Suppl.  
49 Figure 2).



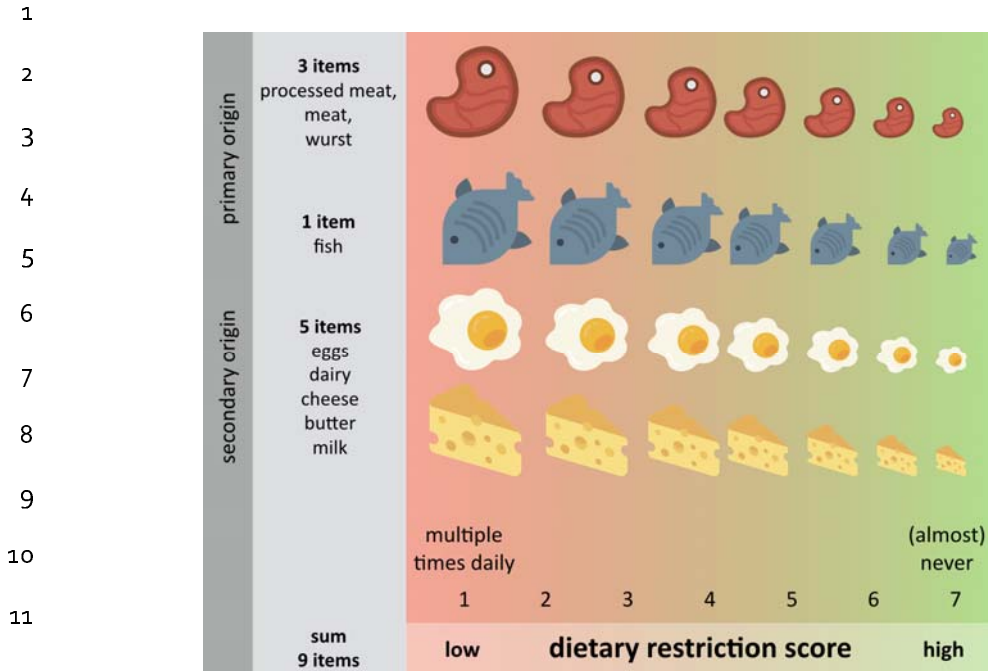

Figure 2: Concept of dietary restriction score (DRS) based on the frequency of consumption of animal-based products over the last 12 months based on 9 items from the FFQ.

Copyright icons: all icons by Smashicons.

17 *Statistical models.* The main analysis included linear regression models to examine  
 18 the association of animal DRS and BMI (model 1), depressive symptoms (model 3)  
 19 and personality traits in a multivariate analysis of covariance (MANCOVA) (model 2).  
 20 More specifically, model 1 tested whether animal DRS predicted BMI, adjusting for  
 21 age, sex and education. Model 2 tested whether animal DRS (factor) was associated  
 22 with the different personality traits (five subscales of the NEO-FFI as dependent  
 23 variables), accounting for age, sex and education (covariates). Model 3 tested  
 24 whether animal DRS predicted CES-D when accounting for age, sex and education;  
 25 and additionally accounting for personality factors and BMI. All variables were  
 26 normally distributed (skewness < |1.06|, kurtosis < |2.08|), personality traits  
 27 (skewness < |1.05|, kurtosis < |3.2|), except for CES-D (skewness 1.4, kurtosis =  
 28 3.3), which was therefore log-transformed ( $\log_{10}(\text{CES-D}+1)$ ). Analyses were  
 29 computed in R version 3.6.1 using `lm`, `lm.beta` and `ggplot2` for visualization.  
 30 Statistical significance was set at  $\alpha = 0.05/3 = 0.015$  in the main analyses to  
 31 adjust for multiple testing with the Bonferroni method and at  $p < 0.05$  in all additional  
 32 analyses.

33

## 34 Results

35 We included 8,943 subjects for analyses regarding diet, BMI and depressive  
 36 symptoms (see Table 1 for demographics), and 7,906 participants in sample 2 for the  
 37 subsample analysis additionally investigating personality traits (see Table 2).

1 Linear regression models detected that lower animal DRS, i.e. higher frequency of  
2 animal-based products consumption, related to higher BMI in sample 1 (n = 8943;  $\beta$   
3 = -.07, p < .001), corrected for confounders (age, sex, education). Higher age, being  
4 male and lower education were also significantly associated with higher BMI, with the  
5 four factors together explaining about 6% of the variance in BMI (overall model adj.  
6  $R^2 = .06$ , p < .001) (Figure 3A, Table 3). Here, age showed the steepest slope (n =  
7 8943;  $\beta = .08$ , p < .001; Figure 3B). Similar results emerged when restricting the  
8 analysis to the smaller sample 2 (data not shown). When additionally correcting for  
9 personality traits the association between BMI and animal DRS remains significant (n  
10 = 7906;  $\beta = -.07$ , p < .001), further certain personality traits show significant  
11 associations with BMI (neuroticism:  $\beta = -.05$ , p < .001; openness:  $\beta = -.05$ , p < .02;  
12 agreeableness:  $\beta = .13$ , p < .001; conscientiousness:  $\beta = -.2$ , p < .001; all n = 7906)  
13 (Table 3).  
14

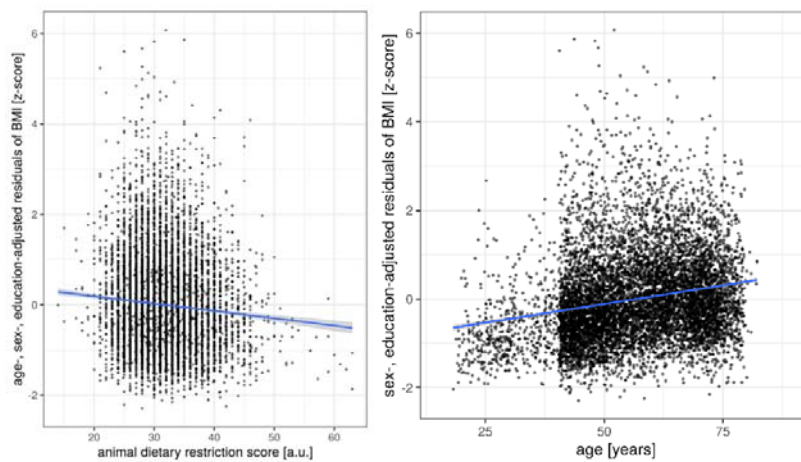

15  
16  
17

Figure 3: Association between BMI and demographic and lifestyle factors A) animal DRS B) age, residuals plotted according to regression model 1 (sample 1 n = 8943).

18

Line gives regression fit. Point size = 1.

19 Further, in sample 2 we found a significant association between frequency of animal-  
20 based products and personality traits, when correcting for age, sex and education (n  
21 = 7906; MANCOVA,  $F_{(5,7897)} = 2.8$ , p < .02): higher restriction of animal products was  
22 negatively associated with extraversion ( $F_{(1,7897)} = 9.8$ , p = .002) (Figure 4, Table 4).  
23 Although non-significant, animal DRS was positively associated with neuroticism ( $F_{(1,7897)} = 3.5$ , p = .06)  
24 and negatively with openness ( $F_{(1,7897)} = 3.4$ , p = .07). Likewise,  
25 sex was significantly associated with all five personality traits; age and education with  
26 four of them (all except for agreeableness) (Table 4).  
27

1

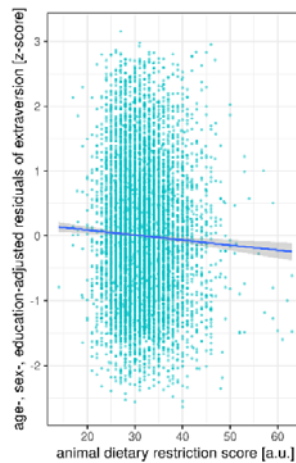

2

3 Figure 4: Association between animal DRS and extraversion, residuals plotted according to regression  
4 model 2 (sample 1 n = 8943).

4

5

Line gives regression fit. Point size = 1.

6

7 Lastly, frequency of animal-based products did not predict variance in depressive  
8 symptoms in sample 1 (n = 8943,  $\beta = .001$ ,  $p = .12$ ), according to a linear regression  
9 model (model 3) that corrected for age, sex, and education (overall model:  $R^2 = .04$ ,  
10  $p < .001$ ) (Table 5). This was also the case for sample 2 (n = 7906, animal DRS:  $\beta =$   
11  $.001$ ,  $p = .10$ ; overall model;  $R^2 = .04$ ;  $p < .001$ ), also when additionally correcting for  
12 personality traits and BMI (n = 7906, animal DRS:  $\beta = .013$ ,  $p = .2$ ; overall model;  $R^2$   
13  $= .21$ ;  $p < .001$ ) (Table 5). Instead, higher neuroticism ( $\beta = .4$ ,  $p < .001$ ), lower  
14 extraversion ( $\beta = -.08$ ,  $p < .001$ ), lower openness ( $\beta = -.07$ ,  $p < .001$ ), lower  
15 conscientiousness ( $\beta = -.08$ ,  $p < .001$ ) and higher BMI ( $\beta = .06$ ,  $p < .001$ ) correlated  
16 with depressive symptoms (overall model explaining 21% of variance on depression  
symptom score) (Figure 5, Table 5).

17

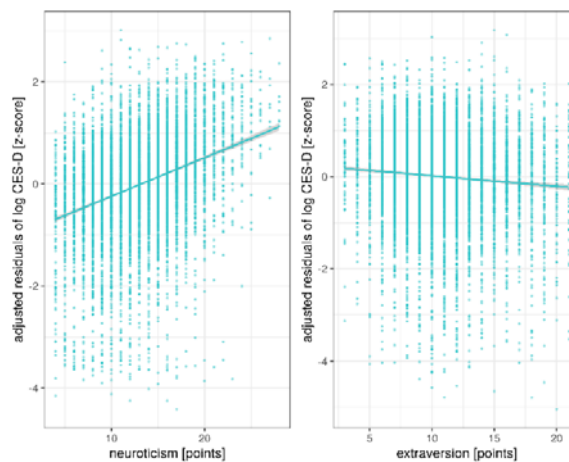

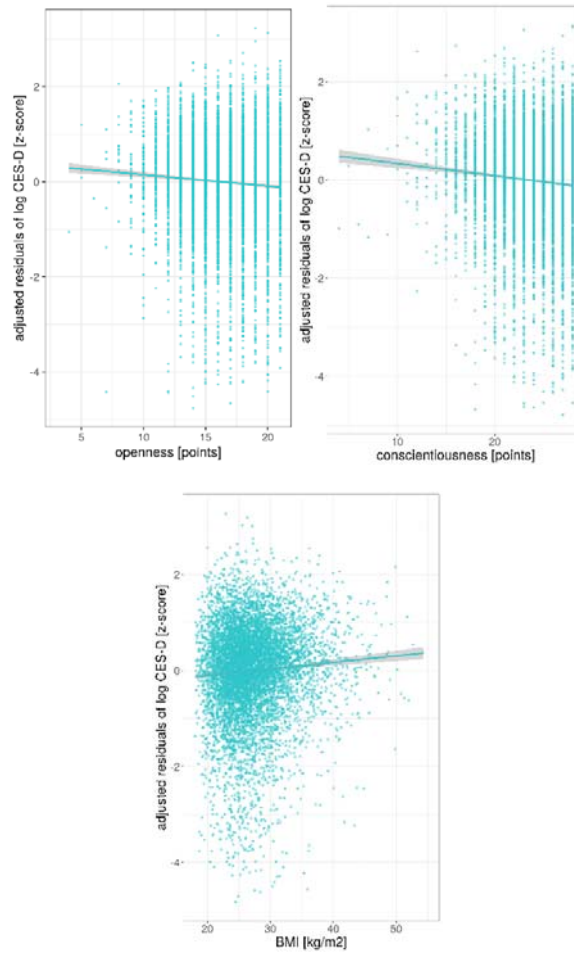

1

2

3 Figure 5: Significant association between personality traits and depressive symptoms in sample 2 (n =  
4 7906) corrected for age, sex, education, animal DRS and the respective four other subscales of  
5 personality for neuroticism, extraversion, agreeableness, conscientiousness and BMI.

6

Lines give regression fit. Position size = 2 (for personality) and 1 (BMI).

7

8 To confirm whether results were not driven by extreme cases with pathological  
9 underweight, we excluded underweight individuals (BMI  $\leq 18.5$  kg/m<sup>2</sup>) from the  
10 analysis (n = 51,  $17.8 \pm 0.6$  kg/m<sup>2</sup> (mean  $\pm$  SD), range 16-18.5). This did not change the  
11 results from the main analyses (data not shown).

12

13

## 1 Exploratory analyses

2 Restricting primary animal source products (i.e. (processed) meat, wurst) was  
3 significantly associated with a lower BMI ( $n = 8943$ ;  $\beta = -.25$ ,  $p < .001$ , Figure 6), but  
4 not restricting intake of secondary animal products (cheese, milk, eggs) ( $n = 8943$ ,  $\beta$   
5  $= -.02$ ,  $p = .16$ ) (Table 6). Note the somewhat stronger association of primary animal-  
6 based products with BMI compared to the “comprehensive” animal-product DRS  
7 score, resulting in a more negative  $\beta$  coefficient.

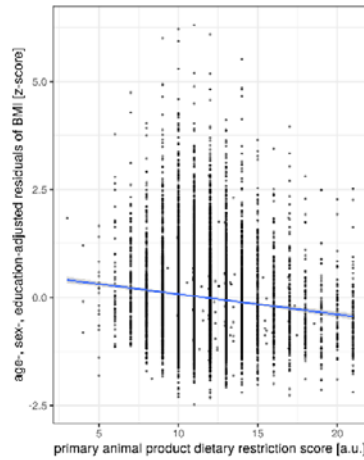

8

9

10

Figure 6: Restrictive animal-based product intake associated with lower BMI.

Lines give regression fit. Position size = 1.

1 Investigating differences in personality, higher primary animal DRS was significantly  
2 associated with lower neuroticism ( $F_{(1,7897)} = 27.5, p < .001$ ), higher openness ( $F_{(1,7897)}$   
3  $= 45.1, p < .001$ ), higher agreeableness ( $F_{(1,7897)} = 262.5, p < .001$ ) and higher  
4 conscientiousness ( $F_{(1,7897)} = 63.1, p < .001$ ). Higher secondary animal DRS was  
5 significantly associated with lower extraversion ( $F_{(1,7897)} = 11.1, p < .001$ ), lower  
6 openness ( $F_{(1,7897)} = 26.9, p < .001$ ), lower agreeableness ( $F_{(1,7897)} = 106.7, p < .001$ )  
7 and lower conscientiousness ( $F_{(1,7897)} = 14.2, p < .001$ ) (all:  $n = 7906$ , MANCOVA,  
8 corrected for age, sex and education) (Suppl. Figure 4).

9 In contrast to the comprehensive animal product DRS, the scores displaying  
10 restriction of either primary or secondary origin animal products were also associated  
11 with lower and higher depression scores, respectively ( $n = 8943$ , primary animal-  
12 product DRS:  $\beta = -.003, p = .04$ ; secondary animal-product DRS:  $\beta = .002, p = .02$ ;  
13 models adjusted for age, sex and education). These divergent associations however  
14 failed to reach significance when additionally correcting for personality traits ( $n =$   
15  $7906$ , all  $|\beta| < .002$ , all  $p > .10$ , adjusted for age, sex, education and personality)  
16 (Table 7).

17 Further, we found a strong positive correlation between the frequency of animal-  
18 based products (animal DRS) and the number of restricted food groups considering  
19 all 33 items (overall DRS) ( $\rho(8941) = .52, p < .001$ ) (Figure 7A).

20 Considering the number of restrictive food items in general, we found that a higher  
21 score of total excluded food items related to lower BMI (sample 1:  $\beta = -.15, t = -8.8, p$   
22  $< .001, R^2 = .07$ , corrected for age, sex and education; sample 2 similar results (data  
23 not shown)) (Figure 7B, Table 6).

24 The number of restricted food items was significantly associated with lower  
25 agreeableness ( $F_{(1,7897)} = 15.7, p < .001$ ) and higher conscientiousness ( $F_{(1,7897)}$   
26  $= 53.9, p < .001$ ) ( $n = 7906$ , MANCOVA,  $F_{(5,7897)} = 11.8, p < .001$ , for model  
27 comparison against null model, corrected for age, sex and education) (Table 8).

28 Surprisingly, a higher number of restricted food items was weakly yet significantly  
29 associated with lower depression scores ( $\beta = -.004, t = -4.1, p < .001, R^2 = .05$ ,  
30 corrected for age, sex and education) (similar results in sample 2 (data not shown)),  
31 also when additionally correcting for differences in personality traits ( $\beta = -.003, t = -$   
32  $2.7, p < .007, R^2 = .21$ ) (Figure 7C, Table 9).

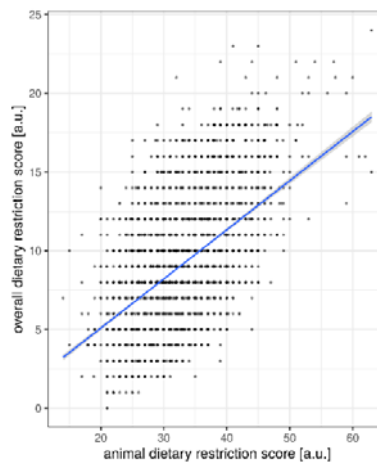

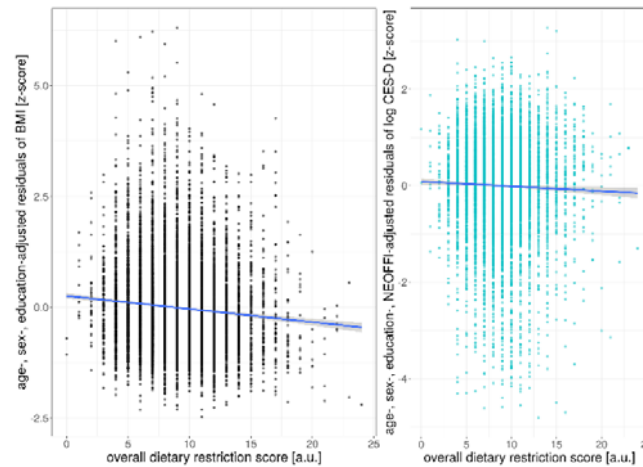

1

2 Figure 7: A) Positive association between decreasing frequency of animal-based products and number  
3 of excluded food groups. Negative association between overall dietary restriction score and B) BMI and  
4 C) CES-D.

5

Position size = 1.

6

## 7 Discussion

8 In this large cross-sectional analysis of ~ 9000 individuals of the general population,  
9 lower frequency of eating animal-based products was significantly associated with  
10 lower BMI, even when adjusting for confounding effects of age, sex and education.  
11 No significant associations emerged between animal-based products consumption  
12 and depressive symptom scores when taking personality into account. Frequency of  
13 animal-based product consumption was associated with personality traits, in  
14 particular with lower extraversion. Surprisingly, not diet but personality was  
15 significantly associated with depression scores.

### 16 *Weight status*

17 Our finding that eating meat and dairy products less frequently relates to lower BMI is  
18 in line with some, but not all, epidemiological and moderate-term randomized  
19 interventional trials which point in this direction too <sup>1,39,40</sup>. In addition, results  
20 remained stable even after adjusting for education, which is a strong predictor of both  
21 obesity <sup>41</sup> and eating habits <sup>42</sup>, and when taking inter-individual variance in  
22 personality traits into account <sup>43</sup>. Speculating on possible underlying mechanisms,  
23 animal-derived products in general are often denser in calories and in total and  
24 saturated fats compared to plant-based foods <sup>44</sup>. In addition, meat and dairy products  
25 are oftentimes consumed as processed food, e.g. wurst, deep-fried meat/fish or high-  
26 processed snack products, further augmenting their caloric footprint. Thus, lower  
27 caloric intake might underlie the observed link between lower frequency of animal-  
28 based product consumption and lower BMI. Moreover, recent observations of  
29 changes in the gut microbiome due to diet raise the hypothesis that a different  
30 distribution of gut bacteria in plant-based dieters alter the ingestion rate of calories  
31 from food <sup>45</sup>, thereby further limiting caloric intake (or bioavailability). However, while  
32 these causal pathways between lower frequency of animal-based product intake  
33 leading to lower or sustained body weight seem biologically plausible, the association  
34 between lower animal-based product intake and lower weight in our cohort might  
35 also be a result of lower body weight leading to less animal-based product intake or  
36 unknown shared factors that modulate both weight and diet. Future longitudinal

1 observations and interventional trials are needed to further test the above-described  
2 hypothesis or its alternatives.

3 The positive association between restriction of meat products on weight status and  
4 the lack of a significant correlation for secondary animal products found in this study  
5 and previously by others<sup>46-48</sup> could possibly be explained by a higher proportion of  
6 highly processed meat items, leading to higher net energy intake and potentially to  
7 higher caloric intake<sup>49</sup>. Further, ongoing discussions on motivations for following  
8 certain diets support the view that restraint eating is not directly linked to vegetarian  
9 or vegan diets but more common in flexitarians who restrict meat intake with the goal  
10 of weight control, which in contrast is not the most common driver in plant-based  
11 dieters<sup>50</sup>.

12 While due to the cross-sectional design using self-reported FFQ data, estimates of  
13 absolute numbers of the strength of the association between diet and BMI are  
14 difficult, our findings may be relevant for public health. Considering that changing a  
15 conventional Western omnivorous dietary habit to a more plant-based diet, i.e.  
16 avoiding (processed) meat and wurst and limiting dairy, cheese and egg intake,  
17 would lead to an increase in animal DRS of 20 points, this would translate into ~ 1.2  
18 kg/m<sup>2</sup> lower BMI. For someone with a frequent intake of primary and secondary  
19 animal-product intake (low animal DRS) this could mean for example reducing all  
20 animal-based products from multiple times a day to multiple times a week (“flexitarian  
21 diet”) or excluding some animal items altogether (“vegan” or “vegetarian” diet). For a  
22 175 cm tall human this would translate into 4 kg of body weight. If obese (e.g. 100  
23 kg, i.e., BMI = 32.7 kg/m<sup>2</sup>), this would mean a reduction of 4% body weight, if  
24 overweight (e.g. 80 kg, BMI = 26.1 kg/m<sup>2</sup>) this would mean a reduction of 5% body  
25 weight. As a reduction of 5-10% body weight has been shown to significantly reduce  
26 obesity-associated co-morbidities in overweight and obesity<sup>51-57</sup>, restricting dietary  
27 intake of animal-based products may be one way to achieve this weight loss goal,  
28 and may help to reduce the societal burden of obesity-related diseases and  
29 environmental impact caused by high animal-product diets<sup>39</sup>. However, these  
30 calculations have to be interpreted with caution, as our findings rely on self-reported  
31 and cross-sectional data only, and we could not quantify dietary intake with regard to  
32 the consumed total amounts of food. Future longitudinal observations and  
33 interventional trials are needed.

#### 34 *Depressive symptoms & personality traits*

35 In contrast to previous large cross-sectional studies<sup>16,17</sup> and a prospective study in  
36 patients with inflammatory bowel disease<sup>58</sup>, frequency of animal-derived product  
37 consumption did not explain variance in depression symptom scores in the current  
38 sample.

39 Yet, intervention studies showed that a plant-based vegan diet compared to a  
40 conventional omnivorous diet reduced anxiety and depression or emotional distress  
41<sup>19-22</sup>, proposing that restricting animal-based products per se may not affect mental  
42 health, but rather exert beneficial effects. Notably, we observed that different  
43 personality traits and BMI predicted depressive symptom score, which hints towards  
44 shared neurobiological mechanisms with obesity<sup>23,25</sup>. These shared mechanisms  
45 might help to explain previous inconsistent findings of a proposed link between  
46 restrictive diets and depression: certain personality traits may increase the probability  
47 to restrict certain food groups from diet, such as openness and conscientiousness<sup>59</sup>.  
48 Such a correlative link between personality and restrictive eating, although missing in  
49 the current data, would thus also apply for restricting animal-based products and may  
50 explain higher depressive symptoms in vegetarians or vegans<sup>16</sup>. Moreover,  
51 sociological studies show that animal-restricted dieters are oftentimes stereotyped



1 with a multitude of biases: detrimental health effects, restrictive lifestyle,  
2 sentimentalism, extremism, lower perceived masculinity<sup>60-62</sup>. Aversion to plant-  
3 based dieters could lead to higher social exclusion and depressive symptoms as a  
4 result. However, more longitudinal studies tracking newly transformed dieters are  
5 needed to clarify if avoiding animal-derived products affects mental health.

6 Differences in our results compared to previous evidence on personality differences  
7 in vegetarians may be due to demographic and societal environmental factors.  
8 Personality trait differences in vegetarians were found in a cohort of college students<sup>15</sup>,  
9 which might be different to our sample of the general population, in terms of  
10 beliefs, motivation of dietary habits and others. Also geographical or cultural settings  
11 may influence differences in the results such as westernized (USA<sup>15</sup>, Germany (this  
12 study)) versus mainly-vegetarian Indian cohorts<sup>29</sup>, who showed higher  
13 conscientiousness. Lastly, the popularity and availability of plant-based dishes is a  
14 strong modulator of societal acceptance and demand for those kinds of diets. For  
15 instance, increasing the offer from one to two plant-based meals in canteens, led to  
16 an increase of 40-80% of plant-based meal purchases, underlining the importance of  
17 availability as a strong driver<sup>63</sup>. Since the interest for plant-based diets has been  
18 changing dynamically in the last decade, researches should take period and location  
19 into account when comparing studies.

20 Strengths of our study comprise the large, well-characterized population based  
21 cohort enabling us to carefully control for important confounders such as education  
22 and personality. Moreover, recent studies and meta-analyses focused specifically on  
23 intake of red and processed meat and related health outcomes (see e.g.<sup>64</sup>), however  
24 the distinction of restricting diets to not consume primary (vegetarian) and/or  
25 secondary animal-products (vegan) is oftentimes overlooked and therefore a strength  
26 of our study.

## 27 **Limitations**

28 Firstly, limitations of our study include that the results are based on a cross-sectional  
29 study design and therefore cannot explain underlying causalities.

30 Secondly, our analyses are based on self-reported dietary food record, which do not  
31 necessarily reflect actual food intake, however, test-retest reliability is generally of  
32 good quality<sup>65</sup>. Moreover, the FFQ used did not ask for quantity of food intake, which  
33 limits the interpretability of the observed effects (for further discussion on possible  
34 mechanisms see<sup>1</sup>). Yet, beside this possible inaccuracy of self-reported food intake,  
35 we propose that excluding certain food groups for a timeframe of 12 months  
36 presumably is a strong and reliable indicator of actual food intake and exclusion of  
37 certain food groups.

38

## 39 **Conclusions**

40 Taken together, using a large cross-sectional analysis we observed that a lower  
41 frequency of animal-based products was related to lower BMI, while no link between  
42 animal-based products intake and depressive symptoms scores emerged. Thus, our  
43 findings may suggest that a lower frequency of animal-based products could be able  
44 to convey benefits on weights status, hinting to the capacity of plant-based diets as a  
45 potentially relevant target for the intervention of obesity and overweight, in particular  
46 by reducing the frequency (and probably the amount) of (especially primary source)  
47 animal-based products. Long-term interventional trials are needed to test this  
48 hypothesis and to clarify the underlying mechanisms.

1

## 2 **Contribution statement**

3 EM and AWW performed literature search and study conception. EM carried out data  
4 analysis and figure design. All authors contributed to data interpretation. All authors  
5 read and approved the final manuscript.

6

## 7 **Declaration of interest**

8 All authors declare no conflict of interest.

9

10

## 11 **References**

- 12 1 Medawar E, Huhn S, Villringer A, Veronica Witte A. The effects of plant-based diets on the body  
13 and the brain: a systematic review. *Transl Psychiatry* 2019; **9**: 226.
- 14 2 Orlich MJ, Singh PN, Sabaté J, *et al.* Vegetarian dietary patterns and mortality in Adventist  
15 Health Study 2. *JAMA Intern Med* 2013; **173**: 1230–8.
- 16 3 Le LT, Sabaté J. Beyond meatless, the health effects of vegan diets: Findings from the  
17 Adventist cohorts. *Nutrients*. 2014; **6**: 2131–47.
- 18 4 Key TJ, Appleby PN, Spencer EA, Travis RC, Roddam AW, Allen NE. Mortality in British  
19 vegetarians: results from the European Prospective Investigation into Cancer and Nutrition  
20 (EPIC-Oxford)–. *Am J Clin Nutr* 2009; **89**: 1613S-1619S.
- 21 5 Mhrshahi S, Ding D, Gale J, Allman-Farinelli M, Banks E, Bauman AE. Vegetarian diet and all-  
22 cause mortality: Evidence from a large population-based Australian cohort-the 45 and Up Study.  
23 *Prev Med (Baltim)* 2017; **97**: 1–7.
- 24 6 Tong TYN, Appleby PN, Bradbury KE, *et al.* Risks of ischaemic heart disease and stroke in  
25 meat eaters, fish eaters, and vegetarians over 18 years of follow-up: results from the  
26 prospective EPIC-Oxford study. *bmj* 2019; **366**: l4897.
- 27 7 Barnard ND, Cohen J, Jenkins DJA, *et al.* A low-fat vegan diet and a conventional diabetes diet  
28 in the treatment of type 2 diabetes: A randomized, controlled, 74-wk clinical trial. In: *American*  
29 *Journal of Clinical Nutrition*. 2009. DOI:10.3945/ajcn.2009.26736H.
- 30 8 Lee Y-M, Kim S-A, Lee I-K, *et al.* Effect of a brown rice based vegan diet and conventional  
31 diabetic diet on glycemic control of patients with type 2 diabetes: a 12-week randomized clinical  
32 trial. *PLoS One* 2016; **11**: e0155918.
- 33 9 Kahleova H, Dort S, Holubkov R, Barnard N. A Plant-Based High-Carbohydrate, Low-Fat Diet in  
34 Overweight Individuals in a 16-Week Randomized Clinical Trial: The Role of Carbohydrates.  
35 *Nutrients* 2018; **10**: 1302.
- 36 10 Kahleova H, Fleeman R, Hlozkova A, Holubkov R, Barnard ND. A plant-based diet in  
37 overweight individuals in a 16-week randomized clinical trial: metabolic benefits of plant protein.  
38 *Nutr Diabetes* 2018; **8**: 58.
- 39 11 Kim M, Hwang S, Park E, Bae J. Strict vegetarian diet improves the risk factors associated with  
40 metabolic diseases by modulating gut microbiota and reducing intestinal inflammation. *Environ*  
41 *Microbiol Rep* 2013; **5**: 765–75.
- 42 12 Tomova A, Bukovsky I, Rembert E, *et al.* The Effects of Vegetarian and Vegan diets on Gut  
43 Microbiota. *Front Nutr* 2019; **6**: 47.
- 44 13 Glick-Bauer M, Yeh M-C. The health advantage of a vegan diet: exploring the gut microbiota

- 1 connection. *Nutrients* 2014; **6**: 4822–38.
- 2 14 David LA, Maurice CF, Carmody RN, *et al.* Diet rapidly and reproducibly alters the human gut  
3 microbiome. *Nature* 2014; **505**: 559–63.
- 4 15 Forestell CA, Nezekle JB. Vegetarianism, depression, and the five factor model of personality.  
5 *Ecol Food Nutr* 2018; **57**: 246–59.
- 6 16 Hibbeln JR, Northstone K, Evans J, Golding J. Vegetarian diets and depressive symptoms  
7 among men. *J Affect Disord* 2018; **225**: 13–7.
- 8 17 Matta J, Czernichow S, Kesse-Guyot E, *et al.* Depressive Symptoms and Vegetarian Diets:  
9 Results from the Constances Cohort. *Nutrients* 2018; **10**: 1695.
- 10 18 Luck-Sikorski C, Jung F, Schlosser K, Riedel-Heller SG. Is orthorexic behavior common in the  
11 general public? A large representative study in Germany. *Eat Weight Disord Anorexia, Bulim*  
12 *Obes* 2019; **24**: 267–73.
- 13 19 Beezhold BL, Johnston CS. Restriction of meat, fish, and poultry in omnivores improves mood:  
14 a pilot randomized controlled trial. *Nutr J* 2012; **11**: 9.
- 15 20 Kahleova H, Hrachovinova T, Hill M, Pelikanova T. Vegetarian diet in type 2 diabetes–  
16 improvement in quality of life, mood and eating behaviour. *Diabet Med* 2013; **30**: 127–9.
- 17 21 Agarwal U, Mishra S, Xu J, Levin S, Gonzales J, Barnard ND. A multicenter randomized  
18 controlled trial of a nutrition intervention program in a multiethnic adult population in the  
19 corporate setting reduces depression and anxiety and improves quality of life: the GEICO study.  
20 *Am J Heal Promot* 2015; **29**: 245–54.
- 21 22 Beezhold B, Radnitz C, Rinne A, DiMatteo J. Vegans report less stress and anxiety than  
22 omnivores. *Nutr Neurosci* 2015; **18**: 289–96.
- 23 23 McElroy SL, Kotwal R, Malhotra S, Nelson EB, Keck Jr PE, Nemeroff CB. Are mood disorders  
24 and obesity related? A review for the mental health professional. *J Clin Psychiatry* 2004.
- 25 24 Vainik U, Dagher A, Realo A, *et al.* Personality-obesity associations are driven by narrow traits:  
26 A meta-analysis. *Obes Rev* 2019; **20**: 1121–31.
- 27 25 Milanesechi Y, Simmons WK, van Rossum EFC, Penninx BWJH. Depression and obesity:  
28 evidence of shared biological mechanisms. *Mol Psychiatry* 2019; **24**: 18.
- 29 26 Ouakinin SRS, Barreira DP, Gois CJ. Depression and obesity: Integrating the role of stress,  
30 neuroendocrine dysfunction and inflammatory pathways. *Front Endocrinol (Lausanne)* 2018; **9**.
- 31 27 Allès B, Baudry J, Méjean C, *et al.* Comparison of sociodemographic and nutritional  
32 characteristics between self-reported vegetarians, vegans, and meat-eaters from the Nutrinet-  
33 Sante study. *Nutrients* 2017; **9**: 1023.
- 34 28 Loeffler M, Engel C, Ahnert P, *et al.* The LIFE-Adult-Study: objectives and design of a  
35 population-based cohort study with 10,000 deeply phenotyped adults in Germany. *BMC Public*  
36 *Health* 2015; **15**: 691.
- 37 29 Priyanka, Tanwar K, Kapoor S. Personality Variations of Vegetarian and Non-vegetarian  
38 Adolescentss. *Indian J Res* 2016; **5**: 68–70.
- 39 30 König W, Lüttinger P, Müller W. A comparative analysis of the development and structure of  
40 educational systems: Methodological foundations and the construction of a comparative  
41 educational scale. Universität Mannheim, Institut für Sozialwissenschaften, 1988.
- 42 31 Herzberg PY, Brähler E. Assessing the Big-Five personality domains via short forms. *Eur J*  
43 *Psychol Assess* 2006; **22**: 139–48.
- 44 32 Costa PT, McCrae RR. NEO PI/FFI manual supplement for use with the NEO Personality  
45 Inventory and the NEO Five-Factor Inventory. Psychological Assessment Resources, 1989.
- 46 33 Körner A, Geyer M, Roth M, *et al.* Persönlichkeitsdiagnostik mit dem neo-fünf-faktoren-inventar:  
47 Die 30-item-kurzversion (neo-ffi-30). *PPmP-Psychotherapie. Psychosom Medizinische Psychol*  
48 *2008*; **58**: 238–45.

- 1 34 Radloff LS. The CES-D scale: A self-report depression scale for research in the general  
2 population. *Appl Psychol Meas* 1977; **1**: 385–401.
- 3 35 Kurth T, Moore SC, Gaziano JM, *et al.* Healthy lifestyle and the risk of stroke in women. *Arch*  
4 *Intern Med* 2006; **166**: 1403–9.
- 5 36 Flöel A, Witte AV, Lohmann H, *et al.* Lifestyle and memory in the elderly. *Neuroepidemiology*  
6 2008; **31**: 39–47.
- 7 37 Norman G. Likert scales, levels of measurement and the “laws” of statistics. *Adv Heal Sci Educ*  
8 2010; **15**: 625–32.
- 9 38 Fraser GE, Yan R, Butler TL, Jaceldo-Siegl K, Beeson WL, Chan J. Missing data in a long food  
10 frequency questionnaire: are imputed zeroes correct? *Epidemiology* 2009; **20**: 289.
- 11 39 Willett W, Rockström J, Loken B, *et al.* Food in the Anthropocene: the EAT–Lancet Commission  
12 on healthy diets from sustainable food systems. *Lancet* 2019.
- 13 40 Spencer EA, Appleby PN, Davey GK, Key TJ. Diet and body mass index in 38 000 EPIC-Oxford  
14 meat-eaters, fish-eaters, vegetarians and vegans. *Int J Obes* 2003; **27**: 728.
- 15 41 Wardle J, Waller J, Jarvis MJ. Sex differences in the association of socioeconomic status with  
16 obesity. *Am J Public Health* 2002; **92**: 1299–304.
- 17 42 Groth M, Fagt S, Brøndsted L. Social determinants of dietary habits in Denmark. *Eur J Clin Nutr*  
18 2001; **55**: 959–66.
- 19 43 Michaud A, Vainik U, Garcia-Garcia I, Dagher A. Overlapping neural endophenotypes in  
20 addiction and obesity. *Front Endocrinol (Lausanne)* 2017; **8**: 127.
- 21 44 Curtain F, Grafenauer S. Plant-Based Meat Substitutes in the Flexitarian Age: An Audit of  
22 Products on Supermarket Shelves. *Nutrients* 2019; **11**: 2603.
- 23 45 Ley RE, Bäckhed F, Turnbaugh P, Lozupone CA, Knight RD, Gordon JI. Obesity alters gut  
24 microbial ecology. *Proc Natl Acad Sci* 2005; **102**: 11070–5.
- 25 46 Tonstad S, Butler T, Yan R, Fraser GE. Type of vegetarian diet, body weight, and prevalence of  
26 type 2 diabetes. *Diabetes Care* 2009; **32**: 791–6.
- 27 47 Biswal BB, Mennes M, Zuo X-N, *et al.* Toward discovery science of human brain function. *Proc*  
28 *Natl Acad Sci* 2010; **107**: 4734–9.
- 29 48 Muga MA, Owili PO, Hsu C-Y, Rau H-H, Chao JCJ. Dietary patterns, gender, and weight status  
30 among middle-aged and older adults in Taiwan: a cross-sectional study. *BMC Geriatr* 2017; **17**:  
31 268.
- 32 49 Hall KD, Ayuketah A, Brychta R, *et al.* Ultra-processed diets cause excess calorie intake and  
33 weight gain: an inpatient randomized controlled trial of ad libitum food intake. *Cell Metab* 2019.
- 34 50 Forestell CA. Flexitarian Diet and Weight Control: Healthy or Risky Eating Behavior? *Front Nutr*  
35 2018; **5**.
- 36 51 Knowler WC, Barrett-Connor E, Fowler SE, *et al.* Reduction in the incidence of type 2 diabetes  
37 with lifestyle intervention or metformin. *N Engl J Med* 2002; **346**: 393–403.
- 38 52 Kuna ST, Reboussin DM, Borradaile KE, *et al.* Long-term effect of weight loss on obstructive  
39 sleep apnea severity in obese patients with type 2 diabetes. *Sleep* 2013; **36**: 641–9.
- 40 53 Li G, Zhang P, Wang J, *et al.* Cardiovascular mortality, all-cause mortality, and diabetes  
41 incidence after lifestyle intervention for people with impaired glucose tolerance in the Da Qing  
42 Diabetes Prevention Study: a 23-year follow-up study. *lancet Diabetes Endocrinol* 2014; **2**: 474–  
43 80.
- 44 54 Dattilo AM, Kris-Etherton PM. Effects of weight reduction on blood lipids and lipoproteins: a  
45 meta-analysis. *Am J Clin Nutr* 1992; **56**: 320–8.
- 46 55 Wing RR, Lang W, Wadden TA, *et al.* Benefits of modest weight loss in improving  
47 cardiovascular risk factors in overweight and obese individuals with type 2 diabetes. *Diabetes*

1            *Care* 2011; **34**: 1481–6.

2    56       Foster GD, Borradaile KE, Sanders MH, *et al.* A randomized study on the effect of weight loss  
3            on obstructive sleep apnea among obese patients with type 2 diabetes: the Sleep AHEAD  
4            study. *Arch Intern Med* 2009; **169**: 1619–26.

5    57       Warkentin LM, Das D, Majumdar SR, Johnson JA, Padwal RS. The effect of weight loss on  
6            health-related quality of life: systematic review and meta-analysis of randomized trials. *Obes*  
7            *Rev* 2014; **15**: 169–82.

8    58       Schreiner P, Yilmaz B, Rossel J-B, *et al.* Vegetarian or gluten-free diets in patients with  
9            inflammatory bowel disease are associated with lower psychological well-being and a different  
10           gut microbiota, but no beneficial effects on the course of the disease. *United Eur Gastroenterol*  
11           *J* 2019; : 2050640619841249.

12   59       Pfeiler TM, Egloff B. Examining the “Veggie” personality: Results from a representative German  
13           sample. *Appetite* 2018; **120**: 246–55.

14   60       Cole M, Morgan K. Vegaphobia: derogatory discourses of veganism and the reproduction of  
15           speciesism in UK national newspapers 1. *Br J Sociol* 2011; **62**: 134–53.

16   61       MacInnis CC, Hodson G. It ain't easy eating greens: Evidence of bias toward vegetarians and  
17           vegans from both source and target. *Gr Process Intergr Relations* 2017; **20**: 721–44.

18   62       Thomas MA. Are vegans the same as vegetarians? The effect of diet on perceptions of  
19           masculinity. *Appetite* 2016; **97**: 79–86.

20   63       Garnett EE, Balmford A, Sandbrook C, Pilling MA, Marteau TM. Impact of increasing vegetarian  
21           availability on meal selection and sales in cafeterias. *Proc Natl Acad Sci* 2019; **116**: 20923–9.

22   64       Johnston BC, Zeraatkar D, Han MA, *et al.* Unprocessed red meat and processed meat  
23           consumption: dietary guideline recommendations from the nutritional recommendations  
24           (NutriRECS) consortium. *Ann Intern Med* 2019.

25   65       Slinger T, Mutschelknauss E, Kropp S, Braendle W, Flesch-Janys D, Chang-Claude J. Test–  
26           retest reliability of self-reported reproductive and lifestyle data in the context of a German case–  
27           control study on breast cancer and postmenopausal hormone therapy. *Ann Epidemiol* 2007; **17**:  
28           993–8.

29  
30  
31  
32

33       Figure 1: Flowchart of sample selection for sample 1 and sample 2. ....7

34       Figure 2: Concept of dietary restriction score (DRS) based on the frequency of consumption  
35       of animal-based products over the last 12 months based on 9 items from the FFQ. ....9

36       Figure 3: Association between BMI and demographic and lifestyle factors A) animal DRS B)  
37       age, residuals plotted according to regression model 1 (sample 1 n = 8943). ....10

38       Figure 4: Association between animal DRS and extraversion, residuals plotted according to  
39       regression model 2 (sample 1 n = 8943). ....11

40       Figure 5: Significant association between personality traits and depressive symptoms in  
41       sample 2 (n = 7906) corrected for age, sex, education, animal DRS and the respective four  
42       other subscales of personality for neuroticism, extraversion, agreeableness,  
43       conscientiousness and BMI. ....12

44       Figure 6: Restrictive animal-based product intake associated with lower BMI. ....13

45       Figure 7: A) Positive association between decreasing frequency of animal-based products  
46       and number of excluded food groups. Negative association between overall dietary restriction  
47       score and B) BMI and C) CES-D. ....15

48  
49  
50       Table 1: Demographic characteristics for sample 1 and sample 2. ....22

1 Table 2: Personality traits according to the five factor personality questionnaire NEO-FFI (16  
2 items) for sample 2 (n=7,906). .....23  
3 Table 3: Multiple regression analyses predicting BMI as function of age, sex, education and  
4 frequency of animal-based products (n = 8943). .....24  
5 Table 4: MANCOVA analysis of animal DRS, age, sex, education on personality (n = 7906).  
6 .....25  
7 Table 5: Multiple regression analyses predicting CES-D as a function of age, sex, education  
8 animal DRS (sample 1, n=8493) and additionally personality traits (sample 2, n = 7906) and  
9 BMI. ....27  
10 Table 6: Multiple regression analyses predicting BMI as a function of age, sex, education and  
11 restriction of different dietary items (sample 1, n=8493). .....29  
12 Table 7: Multiple regression analyses predicting CES-D as a function of age, sex, education  
13 and primary and secondary dietary restriction score (sample 1 n = 8943, sample 2 n = 7906).  
14 .....30  
15 Table 8: MANCOVA analysis of dietary restriction, age, sex, education on personality (n =  
16 7906).....32  
17 Table 9: Multiple regression analyses predicting CES-D as a function of age, sex, education  
18 and dietary restriction score (sample 1 n = 8943, sample 2 n = 7906). .....34  
19  
20 Suppl. Figure 1: Frequency distribution of the dietary scores.....35  
21 Suppl. Figure 2: Correlation plot of nine items included in animal DRS.....36  
22 Suppl. Figure 3: Correlation plot of all measures of interest including dietary patterns, BMI,  
23 CES-D and personality traits.....36  
24 Suppl. Figure 4: Associations frequency of animal-based products and personality traits (top  
25 row: primary DRS; bottom row: secondary DRS).....37  
26  
27 Suppl. Table 1: Summary of computed dietary restriction scores.....37  
28  
29  
30  
31  
32  
33  
34  
35  
36  
37  
38  
39  
40

**Table 1: Demographic characteristics for sample 1 and sample 2.**

|               |             | <b>age</b><br>(years) | <b>sex</b>      | <b>education</b><br>(CASMIN<br>levels) | <b>animal DRS</b><br>(9 - 63) | <b>BMI</b><br>(kg/m <sup>2</sup> ) | <b>CES-D</b><br>(0 - 60) |
|---------------|-------------|-----------------------|-----------------|----------------------------------------|-------------------------------|------------------------------------|--------------------------|
| <b>Sample</b> | <b>mean</b> | 56.6<br>(18-82)       | 8943<br>(4609F) | 2.28<br>(1-3)                          | 31.53<br>(14-63)              | 27.25<br>(16.2-57.3)               | 10.69<br>(0-53)          |
| <b>1</b>      | <b>SD</b>   | 12.5                  | -               | 0.6                                    | 5.1                           | 4.9                                | 6.9                      |
| <b>Sample</b> | <b>mean</b> | 55.7<br>(18-82)       | 7906<br>(4010F) | 2.31<br>(1-3)                          | 31.55<br>(14-63)              | 27.16<br>(16.2-57.3)               | 10.57<br>(0-53)          |

---

|          |           |      |   |     |     |     |     |
|----------|-----------|------|---|-----|-----|-----|-----|
| <b>2</b> | <b>SD</b> | 12.4 | - | 0.6 | 5.1 | 4.7 | 6.9 |
|----------|-----------|------|---|-----|-----|-----|-----|

---

(n=7906)

1  
2  
3  
4  
5  
6  
7  
8  
9  
10  
11  
12  
13  
14  
15  
16  
17  
18  
19  
20  
21  
22  
23  
24  
25

**Table 2: Personality traits according to the five factor personality questionnaire NEO-FFI (16 items) for sample 2 (n=7,906).**

---

|                 |             | <b>Neuroticism</b> | <b>Extraversion</b> | <b>Openness</b> | <b>Agreeable-ness</b> | <b>Conscientious-ness</b> |
|-----------------|-------------|--------------------|---------------------|-----------------|-----------------------|---------------------------|
| <b>Sample 2</b> | <b>mean</b> | 13.2<br>(4-28)     | 10.9<br>(3-21)      | 16.3<br>(4-21)  | 11.7<br>(2-14)        | 23.6<br>(4-28)            |
| <b>(n=7906)</b> | <b>SD</b>   | 4.4                | 3.7                 | 2.7             | 2.0                   | 3.2                       |

---

26  
27  
28  
29  
30  
31  
32

1  
2  
3  
4  
5  
6  
7  
8  
9  
10  
11  
12  
13  
14  
15  
16  
17  
18  
19  
20  
21  
22  
23  
24  
25  
26  
27

**Table 3: Multiple regression analyses predicting BMI as function of age, sex, education and frequency of animal-based products (n = 8943).**

|                                                                        | Adj. R2 | B     | C.I.          | beta  | p      |
|------------------------------------------------------------------------|---------|-------|---------------|-------|--------|
| <b>BMI (model 1)</b>                                                   |         |       |               |       |        |
| Model                                                                  | 0.06    |       |               |       | <0.001 |
| sex                                                                    |         | -0.59 | [-0.79 -0.40] | -0.06 | <0.001 |
| education                                                              |         | -0.67 | [-0.83 -0.50] | -0.08 | <0.001 |
| age                                                                    |         | 0.08  | [0.07 0.09]   | 0.21  | <0.001 |
| animal DRS                                                             |         | -0.07 | [-0.09 -0.05] | -0.06 | <0.001 |
|                                                                        |         |       |               |       |        |
| <b>BMI (model 1) – sample 2 (df = 7896), corrected for personality</b> |         |       |               |       |        |
| Model                                                                  | 0.08    |       |               |       | <0.001 |
| sex                                                                    |         | -0.55 | [-0.78 -0.33] | -0.06 | <0.001 |
| education                                                              |         | -0.65 | [-0.83 -0.47] | -0.08 | <0.001 |
| age                                                                    |         | 0.09  | [0.09 0.10]   | 0.24  | <0.001 |
| animal DRS                                                             |         | -0.07 | [-0.09 -0.05] | -0.07 | <0.001 |



|                          |  |       |               |       |                  |
|--------------------------|--|-------|---------------|-------|------------------|
| <b>neuroticism</b>       |  | -0.05 | [-0.08 -0.03] | -0.05 | <b>0.001</b>     |
| extraversion             |  | 0.01  | [-0.02 0.04]  | 0.01  | 0.42             |
| <b>openness</b>          |  | -0.05 | [-0.10 -0.01] | -0.03 | <b>0.01</b>      |
| <b>agreeableness</b>     |  | 0.13  | [0.07 0.19]   | 0.05  | <b>&lt;0.001</b> |
| <b>conscientiousness</b> |  | -0.20 | [-0.23 -0.16] | -0.13 | <b>&lt;0.001</b> |

*B/beta represent unstandardized/standardized regression coefficients*

1  
2  
3  
4  
5  
6  
7  
8  
9  
10  
11

**Table 4: MANCOVA analysis of animal DRS, age, sex, education on personality (n = 7906).**

|                                                                          | Pillai's trace | F     | df | num df | den df | p                |
|--------------------------------------------------------------------------|----------------|-------|----|--------|--------|------------------|
| <b>NEOFFI (model 2) (all factors, corrected for age, sex, education)</b> |                |       |    |        |        |                  |
| <b>sex</b>                                                               | 0.17           | 322.2 | 1  | 5      | 7897   | <b>&lt;0.001</b> |
| <b>education</b>                                                         | 0.04           | 66.9  | 1  | 5      | 7897   | <b>&lt;0.001</b> |
| <b>age</b>                                                               | 0.04           | 69.3  | 1  | 5      | 7897   | <b>&lt;0.001</b> |
| <b>animal DRS</b>                                                        | 0.002          | 2.8   | 1  | 5      | 7897   | <b>0.016</b>     |
|                                                                          |                |       |    |        |        |                  |
| <b>NEOFFI Neuroticism</b>                                                |                |       |    |        |        |                  |
| <b>sex</b>                                                               |                | 327.6 | 1  | 5      | 7897   | <b>&lt;0.001</b> |
| <b>education</b>                                                         |                | 113.5 | 1  | 5      | 7897   | <b>&lt;0.001</b> |
| <b>age</b>                                                               |                | 28.5  | 1  | 5      | 7897   | <b>&lt;0.001</b> |
| animal DRS                                                               |                | 3.5   | 1  | 5      | 7897   | 0.06             |
|                                                                          |                |       |    |        |        |                  |
| <b>NEOFFI Extraversion</b>                                               |                |       |    |        |        |                  |
| <b>sex</b>                                                               |                | 15.9  | 1  | 5      | 7897   | <b>&lt;0.001</b> |
| <b>education</b>                                                         |                | 71.1  | 1  | 5      | 7897   | <b>&lt;0.001</b> |

|                                 |  |        |   |   |      |                  |
|---------------------------------|--|--------|---|---|------|------------------|
| <b>age</b>                      |  | 152.7  | 1 | 5 | 7897 | <b>&lt;0.001</b> |
| <b>animal DRS</b>               |  | 9.8    | 1 | 5 | 7897 | <b>0.002</b>     |
|                                 |  |        |   |   |      |                  |
| <b>NEOFFI Openness</b>          |  |        |   |   |      |                  |
| <b>sex</b>                      |  | 7.3    | 1 | 5 | 7897 | <b>0.007</b>     |
| <b>education</b>                |  | 208.4  | 1 | 5 | 7897 | <b>&lt;0.001</b> |
| <b>age</b>                      |  | 4.6    | 1 | 5 | 7897 | <b>0.03</b>      |
| <b>animal DRS</b>               |  | 3.4    | 1 | 5 | 7897 | 0.07             |
|                                 |  |        |   |   |      |                  |
| <b>NEOFFI Agreeableness</b>     |  |        |   |   |      |                  |
| <b>sex</b>                      |  | 953.5  | 1 | 5 | 7897 | <b>&lt;0.001</b> |
| <b>education</b>                |  | 1.0    | 1 | 5 | 7897 | 0.33             |
| <b>age</b>                      |  | 0.7    | 1 | 5 | 7897 | 0.39             |
| <b>animal DRS</b>               |  | 0.03   | 1 | 5 | 7897 | 0.87             |
|                                 |  |        |   |   |      |                  |
| <b>NEOFFI Conscientiousness</b> |  |        |   |   |      |                  |
| <b>sex</b>                      |  | 137.4  | 1 | 5 | 7897 | <b>&lt;0.001</b> |
| <b>education</b>                |  | 10.7   | 1 | 5 | 7897 | <b>0.001</b>     |
| <b>age</b>                      |  | 148.4  | 1 | 5 | 7897 | <b>&lt;0.001</b> |
| <b>animal DRS</b>               |  | 0.0006 | 1 | 5 | 7897 | 0.98             |

1

2

3

4

5

6

7

8

9

10

11

12

13

1  
2  
3  
4  
5  
6  
7  
8  
9  
10  
11  
12  
13  
14  
15

**Table 5: Multiple regression analyses predicting CES-D as a function of age, sex, education animal DRS (sample 1, n=8493) and additionally personality traits (sample 2, n = 7906) and BMI.**

|                                                                          | Adj. R2 | B     | C.I.              | beta   | p      |
|--------------------------------------------------------------------------|---------|-------|-------------------|--------|--------|
| <b>CES-D (model 3) - sample 1 (df = 8938)</b>                            |         |       |                   |        |        |
| Model                                                                    | 0.04    |       |                   |        | <0.001 |
| sex                                                                      |         | 0.04  | [0.029 0.051]     | 0.071  | <0.001 |
| education                                                                |         | -0.09 | [-0.10 -0.08]     | -0.184 | <0.001 |
| age                                                                      |         | 0.001 | [0.0007 0.0016]   | 0.050  | <0.001 |
| animal DRS                                                               |         | 0.001 | [-0.0002 0.0020]  | 0.016  | 0.12   |
|                                                                          |         |       |                   |        |        |
| <b>CES-D (model 3) - sample 2 (df = 7901)</b>                            |         |       |                   |        |        |
| Model                                                                    | 0.04    |       |                   |        |        |
| sex                                                                      |         | 0.04  | [0.0273 0.0523]   | 0.069  | <0.001 |
| education                                                                |         | -0.09 | [-0.1001 -0.0786] | -0.180 | <0.001 |
| age                                                                      |         | 0.001 | [0.0006 0.0016]   | 0.049  | <0.001 |
| animal DRS                                                               |         | 0.001 | [-0.0002 0.0022]  | 0.018  | 0.10   |
|                                                                          |         |       |                   |        |        |
| <b>CES-D (model 3) - sample 2 (df = 7896), corrected for personality</b> |         |       |                   |        |        |

|                                                                                  |      |         |                  |        |                  |
|----------------------------------------------------------------------------------|------|---------|------------------|--------|------------------|
| Model                                                                            | 0.21 |         |                  |        |                  |
| sex                                                                              |      | 0.011   | [-0.001 0.024]   | 0.02   | 0.08             |
| <b>education</b>                                                                 |      | -0.06   | [-0.07 -0.05]    | -0.12  | <b>&lt;0.001</b> |
| <b>age</b>                                                                       |      | 0.0006  | [0.0001 0.0011]  | 0.03   | <b>0.015</b>     |
| animal DRS                                                                       |      | 0.0005  | [-0.0006 0.0015] | 0.009  | 0.40             |
| <b>neuroticism</b>                                                               |      | 0.024   | [0.022 0.025]    | 0.36   | <b>&lt;0.001</b> |
| <b>extraversion</b>                                                              |      | -0.006  | [-0.008 -0.005]  | -0.08  | <b>&lt;0.001</b> |
| <b>openness</b>                                                                  |      | -0.007  | [-0.010 -0.005]  | -0.07  | <b>&lt;0.001</b> |
| agreeableness                                                                    |      | -0.0004 | [-0.004 0.003]   | -0.003 | 0.80             |
| <b>conscientiousness</b>                                                         |      | -0.008  | [-0.009 -0.006]  | -0.08  | <b>&lt;0.001</b> |
|                                                                                  |      |         |                  |        |                  |
| <b>CES-D (model 3) - sample 2 (df = 7895), corrected for personality and BMI</b> |      |         |                  |        |                  |
| Model                                                                            | 0.21 |         |                  |        | <0.001           |
| <b>sex</b>                                                                       |      | 0.013   | [0.0008 0.026]   | 0.02   | <b>0.04</b>      |
| <b>education</b>                                                                 |      | -0.06   | [-0.082 -0.039]  | -0.11  | <b>&lt;0.001</b> |
| age                                                                              |      | 0.0002  | [-0.066 -0.046]  | 0.01   | 0.32             |
| animal DRS                                                                       |      | 0.001   | [-0.004 0.002]   | 0.013  | 0.20             |
| <b>neuroticism</b>                                                               |      | 0.024   | [0.022 0.025]    | 0.36   | <b>&lt;0.001</b> |
| <b>extraversion</b>                                                              |      | -0.006  | [-0.008 -0.005]  | -0.08  | <b>&lt;0.001</b> |
| <b>openness</b>                                                                  |      | -0.007  | [-0.010 -0.005]  | -0.07  | <b>0.14</b>      |
| agreeableness                                                                    |      | -0.0009 | [-0.004 0.003]   | -0.006 | 0.60             |
| <b>conscientiousness</b>                                                         |      | -0.007  | [-0.009 -0.005]  | -0.08  | <b>&lt;0.001</b> |
| <b>BMI</b>                                                                       |      | 0.004   | [ 0.002 0.005]   | 0.06   | <b>&lt;0.001</b> |

*B/beta represent unstandardized/standardized regression coefficients*

1  
2  
3  
4  
5  
6  
7  
8  
9  
10

1  
2  
3  
4  
5  
6  
7  
8  
9  
10  
11  
12  
13  
14  
15  
16  
17  
18  
19

**Table 6: Multiple regression analyses predicting BMI as a function of age, sex, education and restriction of different dietary items (sample 1, n=8493).**

|                                             | Adj. R2 | B     | C.I.          | beta   | p                |
|---------------------------------------------|---------|-------|---------------|--------|------------------|
| <b>BMI (model 1) – primary animal DRS</b>   |         |       |               |        |                  |
| Model                                       | 0.07    |       |               |        | <0.001           |
| sex                                         |         | -0.18 | [-0.38 0.03]  | -0.018 | 0.10             |
| <b>education</b>                            |         | -0.61 | [-0.76 -0.44] | -0.074 | <b>&lt;0.001</b> |
| <b>age</b>                                  |         | 0.09  | [0.08 0.10]   | 0.225  | <b>&lt;0.001</b> |
| <b>primary animal DRS</b>                   |         | -0.25 | [-0.29 -0.21] | -0.132 | <b>&lt;0.001</b> |
| <b>BMI (model 1) – secondary animal DRS</b> |         |       |               |        |                  |
| Model                                       | 0.06    |       |               |        | <0.001           |
| <b>sex</b>                                  |         | -0.63 | [-0.84 -0.43] | -0.065 | <b>&lt;0.001</b> |
| <b>education</b>                            |         | -0.65 | [-0.82 -0.49] | -0.079 | <b>&lt;0.001</b> |
| <b>age</b>                                  |         | 0.08  | [0.07 0.09]   | 0.209  | <b>&lt;0.001</b> |
| secondary animal DRS                        |         | -0.02 | [-0.04 -0.01] | -0.015 | 0.16             |
| <b>BMI (model 1) – overall DRS</b>          |         |       |               |        |                  |
| Model                                       | 0.07    |       |               |        | <0.001           |
| <b>sex</b>                                  |         | -0.50 | [-0.69 -0.30] | -0.051 | <b>&lt;0.001</b> |

|                    |  |       |               |        |                  |
|--------------------|--|-------|---------------|--------|------------------|
| <b>education</b>   |  | -0.70 | [-0.83 -0.49] | -0.080 | <b>&lt;0.001</b> |
| <b>age</b>         |  | 0.09  | [0.08 0.10]   | 0.221  | <b>&lt;0.001</b> |
| <b>overall DRS</b> |  | -0.15 | [-0.18 -0.11] | -0.091 | <b>&lt;0.001</b> |

1 *B/beta represent unstandardized/standardized regression coefficients*

2

3

4

5

6

7

8 **Table 7: Multiple regression analyses predicting CES-D as a function of age, sex, education and**  
 9 **primary and secondary dietary restriction score (sample 1 n = 8943, sample 2 n = 7906).**

|                                                                | <b>Adj. R2</b> | <b>B</b> | <b>C.I.</b>       | <b>beta</b> | <b>p</b>         |
|----------------------------------------------------------------|----------------|----------|-------------------|-------------|------------------|
| <b>CES-D - sample 1 (df = 8938)</b>                            |                |          |                   |             |                  |
| <b>Model</b>                                                   | 0.04           |          |                   |             | <b>&lt;0.001</b> |
| <b>sex</b>                                                     |                | 0.05     | [0.031 0.058]     | 0.08        | <b>&lt;0.001</b> |
| <b>education</b>                                               |                | -0.09    | [-0.100 -0.078]   | -0.18       | <b>&lt;0.001</b> |
| <b>age</b>                                                     |                | 0.001    | [0.0007 0.0017]   | 0.05        | <b>&lt;0.001</b> |
| <b>primary DRS</b>                                             |                | -0.003   | [-0.005 -0.00008] | -0.02       | <b>0.04</b>      |
| <b>CES-D - sample 2 (df = 7896), corrected for personality</b> |                |          |                   |             |                  |
| <b>Model</b>                                                   | 0.21           |          |                   |             | <b>&lt;0.001</b> |
| <b>sex</b>                                                     |                | 0.014    | [0.0008 0.0270]   | 0.02        | <b>0.04</b>      |
| <b>education</b>                                               |                | -0.06    | [-0.068 -0.048]   | -0.12       | <b>&lt;0.001</b> |
| <b>age</b>                                                     |                | 0.0006   | [0.0001 0.0011]   | 0.03        | <b>0.01</b>      |
| primary DRS                                                    |                | -0.002   | [-0.004 -0.001]   | -0.01       | 0.21             |
| <b>neuroticism</b>                                             |                | 0.024    | [0.022 0.025]     | 0.36        | <b>&lt;0.001</b> |
| <b>extraversion</b>                                            |                | -0.006   | [-0.008 -0.005]   | -0.08       | <b>&lt;0.001</b> |
| <b>openness</b>                                                |                | -0.007   | [-0.010 -0.005]   | -0.07       | <b>&lt;0.001</b> |
| agreeableness                                                  |                | -0.0003  | [-0.004 0.003]    | -0.002      | 0.84             |
| <b>conscientiousness</b>                                       |                | -0.007   | [-0.009 -0.006]   | -0.08       | <b>&lt;0.001</b> |
|                                                                |                |          |                   |             |                  |
| <b>CES-D - sample 1 (df = 8938)</b>                            |                |          |                   |             |                  |
| <b>Model</b>                                                   | 0.04           |          |                   |             | <b>&lt;0.001</b> |

|                                                                |      |         |                 |        |                  |
|----------------------------------------------------------------|------|---------|-----------------|--------|------------------|
| <b>sex</b>                                                     |      | 0.04    | [0.032 0.055]   | 0.08   | <b>&lt;0.001</b> |
| <b>education</b>                                               |      | -0.09   | [-0.10 -0.08]   | -0.20  | <b>&lt;0.001</b> |
| <b>age</b>                                                     |      | 0.001   | [0.0007 0.0016] | 0.05   | <b>&lt;0.001</b> |
| <b>secondary DRS</b>                                           |      | 0.002   | [0.0003 0.003]  | -0.03  | <b>0.02</b>      |
| <b>CES-D - sample 2 (df = 7896), corrected for personality</b> |      |         |                 |        |                  |
| <b>Model</b>                                                   | 0.21 |         |                 |        | <b>&lt;0.001</b> |
| <b>sex</b>                                                     |      | 0.013   | [0.0010 0.0261] | 0.02   | <b>0.05</b>      |
| <b>education</b>                                               |      | -0.06   | [-0.068 -0.048] | -0.12  | <b>&lt;0.001</b> |
| <b>age</b>                                                     |      | 0.0006  | [0.0001 0.0011] | 0.03   | <b>0.01</b>      |
| secondary DRS                                                  |      | 0.001   | [-0.005 0.002]  | 0.01   | 0.20             |
| <b>neuroticism</b>                                             |      | 0.024   | [0.022 0.025]   | 0.36   | <b>&lt;0.001</b> |
| <b>extraversion</b>                                            |      | -0.006  | [-0.008 -0.005] | -0.08  | <b>&lt;0.001</b> |
| <b>openness</b>                                                |      | -0.007  | [-0.010 -0.005] | -0.07  | <b>&lt;0.001</b> |
| agreeableness                                                  |      | -0.0003 | [-0.004 0.003]  | -0.002 | 0.84             |
| <b>conscientiousness</b>                                       |      | -0.008  | [-0.009 -0.006] | -0.08  | <b>&lt;0.001</b> |

1

2

3

4

5

6

7

8

9

10

11

12

13

14

15

1

2

3

4

5

6

7

8

9

10 **Table 8: MANCOVA analysis of dietary restriction, age, sex, education on personality (n = 7906).**

|                                                                           | Pillai's trace | F     | df | num df | den df | p      |
|---------------------------------------------------------------------------|----------------|-------|----|--------|--------|--------|
| <b>NEOFFI (all factors) – sample 2, corrected for age, sex, education</b> |                |       |    |        |        |        |
| sex                                                                       | 0.169          | 320.0 | 1  | 5      | 7897   | <0.001 |
| education                                                                 | 0.041          | 67.4  | 1  | 5      | 7897   | <0.001 |
| age                                                                       | 0.040          | 65.2  | 1  | 5      | 7897   | <0.001 |
| overall DRS                                                               | 0.007          | 11.8  | 1  | 5      | 7897   | <0.001 |
|                                                                           |                |       |    |        |        |        |
| <b>NEOFFI Neuroticism</b>                                                 |                |       |    |        |        |        |
| sex                                                                       |                | 342.0 | 1  | 5      | 7897   | <0.001 |
| education                                                                 |                | 114.5 | 1  | 5      | 7897   | <0.001 |
| age                                                                       |                | 28.9  | 1  | 5      | 7897   | <0.001 |
| overall DRS                                                               |                | 0.6   | 1  | 5      | 7897   | 0.44   |
|                                                                           |                |       |    |        |        |        |
| <b>NEOFFI Extraversion</b>                                                |                |       |    |        |        |        |
| sex                                                                       |                | 14.5  | 1  | 5      | 7897   | <0.001 |
| education                                                                 |                | 72.6  | 1  | 5      | 7897   | <0.001 |
| age                                                                       |                | 149.3 | 1  | 5      | 7897   | <0.001 |
| overall DRS                                                               |                | 0.3   | 1  | 5      | 7897   | 0.6    |
|                                                                           |                |       |    |        |        |        |
| <b>NEOFFI Openness</b>                                                    |                |       |    |        |        |        |
| sex                                                                       |                | 6.1   | 1  | 5      | 7897   | 0.01   |



|                                 |  |       |   |   |      |                  |
|---------------------------------|--|-------|---|---|------|------------------|
| <b>education</b>                |  | 209.8 | 1 | 5 | 7897 | <b>&lt;0.001</b> |
| <b>age</b>                      |  | 4.9   | 1 | 5 | 7897 | <b>0.03</b>      |
| overall DRS                     |  | 1.6   | 1 | 5 | 7897 | 0.21             |
| <b>NEOFFI Agreeableness</b>     |  |       |   |   |      |                  |
| <b>sex</b>                      |  | 937.3 | 1 | 5 | 7897 | <b>&lt;0.001</b> |
| education                       |  | 0.9   | 1 | 5 | 7897 | 0.34             |
| age                             |  | 0.2   | 1 | 5 | 7897 | 0.7              |
| <b>overall DRS</b>              |  | 15.7  | 1 | 5 | 7897 | <b>&lt;0.001</b> |
| <b>NEOFFI Conscientiousness</b> |  |       |   |   |      |                  |
| <b>sex</b>                      |  | 122.4 | 1 | 5 | 7897 | <b>&lt;0.001</b> |
| <b>education</b>                |  | 10.7  | 1 | 5 | 7897 | <b>0.001</b>     |
| <b>age</b>                      |  | 130.7 | 1 | 5 | 7897 | <b>&lt;0.001</b> |
| <b>overall DRS</b>              |  | 53.9  | 1 | 5 | 7897 | <b>&lt;0.001</b> |

1

2

3

4

5

6

7

8

9

10

11

12

13

14

15

1  
2  
3  
4  
5  
6  
7  
8  
9

**Table 9: Multiple regression analyses predicting CES-D as a function of age, sex, education and dietary restriction score (sample 1 n = 8943, sample 2 n = 7906).**

|                                                                | Adj. R2 | B      | C.I.            | beta   | p            |
|----------------------------------------------------------------|---------|--------|-----------------|--------|--------------|
| <b>CES-D - sample 1 (df = 8938)</b>                            |         |        |                 |        |              |
| <b>Model</b>                                                   | 0.05    |        |                 |        | <0.001       |
| <b>sex</b>                                                     |         | 0.04   | [0.032 0.055]   | 0.076  | <0.001       |
| <b>education</b>                                               |         | -0.09  | [-0.100 -0.080] | -0.185 | <0.001       |
| <b>age</b>                                                     |         | 0.001  | [0.0008 0.0017] | 0.054  | <0.001       |
| <b>overall DRS</b>                                             |         | -0.004 | [-0.006 -0.002] | -0.043 | <0.001       |
|                                                                |         |        |                 |        |              |
| <b>CES-D - sample 2 (df = 7901)</b>                            |         |        |                 |        |              |
| <b>Model</b>                                                   | 0.04    |        |                 |        | <0.001       |
| <b>sex</b>                                                     |         | 0.04   | [0.031 0.056]   | 0.075  | <0.001       |
| <b>education</b>                                               |         | -0.09  | [-0.100 -0.080] | -0.180 | <0.001       |
| <b>age</b>                                                     |         | 0.001  | [0.0008 0.0017] | 0.054  | <0.001       |
| <b>overall DRS</b>                                             |         | -0.005 | [-0.007 -0.002] | -0.048 | <0.001       |
|                                                                |         |        |                 |        |              |
| <b>CES-D - sample 2 (df = 7896), corrected for personality</b> |         |        |                 |        |              |
| <b>Model</b>                                                   | 0.21    |        |                 |        | <0.001       |
| <b>sex</b>                                                     |         | 0.014  | [0.0010 0.0261] | 0.02   | <b>0.04</b>  |
| <b>education</b>                                               |         | -0.06  | [-0.068 -0.048] | -0.12  | <0.001       |
| <b>age</b>                                                     |         | 0.0007 | [0.0002 0.0011] | 0.03   | <b>0.007</b> |
| <b>overall DRS</b>                                             |         | -0.003 | [-0.004 -0.001] | -0.03  | <b>0.007</b> |
| <b>neuroticism</b>                                             |         | 0.024  | [0.022 0.025]   | 0.36   | <0.001       |

|                          |  |         |                 |        |                  |
|--------------------------|--|---------|-----------------|--------|------------------|
| <b>extraversion</b>      |  | -0.006  | [-0.008 -0.005] | -0.08  | <b>&lt;0.001</b> |
| <b>openness</b>          |  | -0.007  | [-0.010 -0.005] | -0.07  | <b>&lt;0.001</b> |
| agreeableness            |  | -0.0005 | [-0.004 0.003]  | -0.004 | 0.76             |
| <b>conscientiousness</b> |  | -0.007  | [-0.009 -0.006] | -0.08  | <b>&lt;0.001</b> |

1

*B/beta represent unstandardized/standardized regression coefficients*

2

3

4

5

6

## Supplementary Material

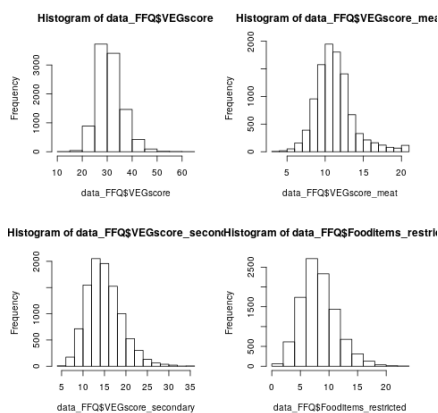

7

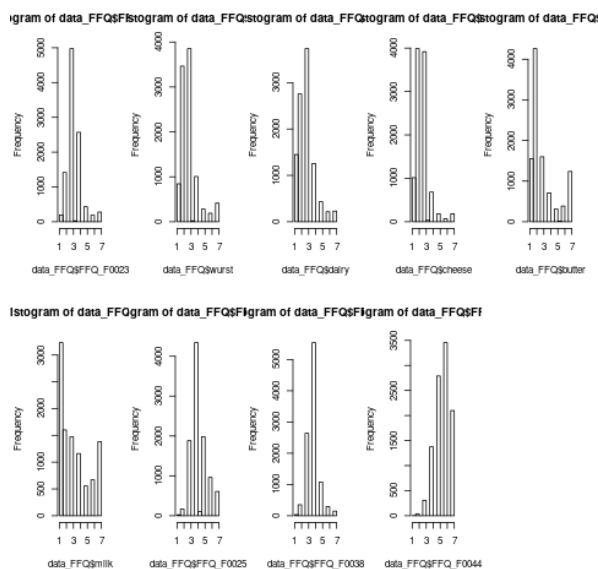

8

9

Suppl. Figure 1: Frequency distribution of the dietary scores.

10

A) animal DRS B) primary animal DRS C) secondary animal DRS and D) overall DRS. All scores are normally distributed (skewness >0.5 and <1).  
E) Frequency distributions of 9 items used in animal DRS.

11

12

13

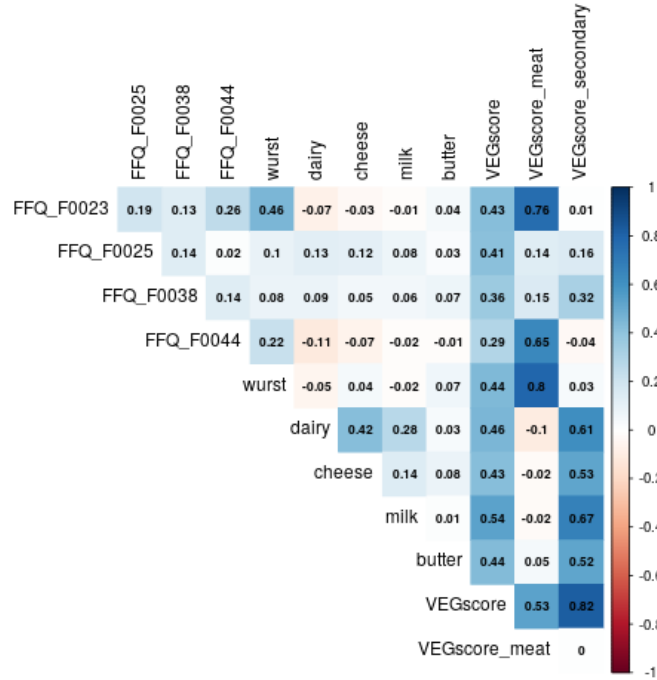

1

2

Suppl. Figure 2: Correlation plot of nine items included in animal DRS.

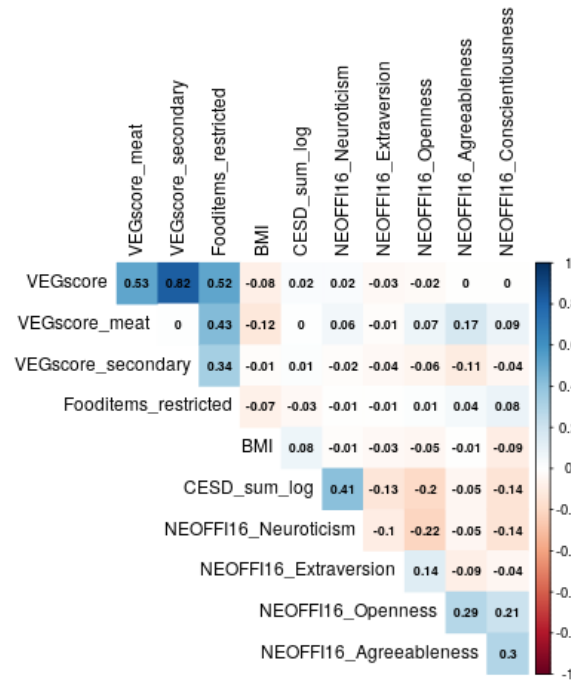

3

4

5

6

7

8

Suppl. Figure 3: Correlation plot of all measures of interest including dietary patterns, BMI, CES-D and personality traits.

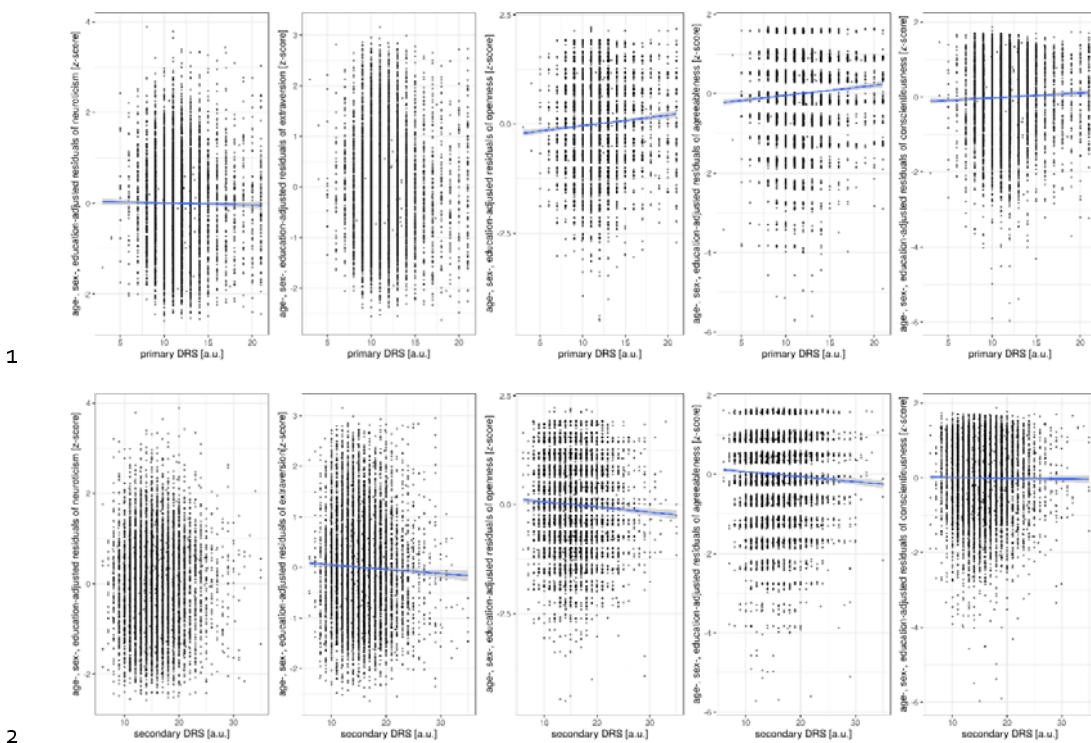

1

2

3

4

5

6

7

8

9

10

11

Suppl. Figure 4: Associations frequency of animal-based products and personality traits (top row: primary DRS; bottom row: secondary DRS).

Suppl. Table 1: Summary of computed dietary restriction scores.

|          |      | animal          | primary        | secondary      | overall       |
|----------|------|-----------------|----------------|----------------|---------------|
|          |      | DRS             | animal DRS     | animal DRS     | DRS           |
|          |      | (9 - 63)        | (3 - 21)       | (5 - 35)       | (0 - 33)      |
| Sample 1 | mean | 31.5<br>(14-63) | 11.7<br>(3-21) | 15.5<br>(6-35) | 8.7<br>(0-24) |
| (n=8943) | SD   | 5.1             | 2.6            | 4.0            | 3.1           |

12
